# Supplementary material
Source: HighWire-hosted journal article supplement (http://molpharm.aspetjournals.org/highwire/filestream/77498/field_highwire_adjunct_files/0/Supplemental_104521.pdf)
Supplement: Supplemental_104521.pdf [file Supplemental_104521.pdf]

# Molecular Pharmacology

## Protein RS1 (*RSC1A1*) Downregulates the Exocytotic Pathway of Glucose Transporter SGLT1 at Low Intracellular Glucose via Inhibition of Ornithine Decarboxylase

Chakravarthi Chintalapati, Thorsten Keller, Thomas D. Mueller, Valentin Gorboulev, Nadine Schäfer,  
Ilona Zilkowski, Maïke Veyhl-Wichmann, Dietmar Geiger, Jürgen Groll, Hermann Koepsell

### Supplemental Data

**Supplemental Table 1.** Proteins that have been identified by two-hybrid split ubiquitin screening of a human embryonic kidney library using hRS1(1-312) as bait. hRS1(1- 312) is almost identical with the membrane-associated 31k molecular mass hRS1-fragment containing hRS1-Reg that is associated with hODC1 (see Fig. 2).

| Name of the identified protein                       | GeneBank accession number |
|------------------------------------------------------|---------------------------|
| ADP/ATP translocase 2                                | AAH12423.1                |
| Annexin-2                                            | AAH68065.1                |
| Human heat shock 60kDa protein 1 (HSPD1)             | NP_955472.1               |
| Ornithine decarboxylase 1(hODC1)                     | NP_002530.1               |
| Osteopontin                                          | AAA59974.1                |
| Receptor of activated protein C kinase 1<br>(GNB2L1) | NP_006089.1               |
| Superoxide dismutase 2                               | AAH12423.1                |
| Uromodulin                                           | AAA36799.1                |
